# Supplementary material for: Antimicrobial activities of Diltiazem Hydrochloride: drug repurposing approach
Source: PeerJ. 2024 Sep 23;12:e17809. doi: 10.7717/peerj.17809 (PMC11426324; doi:10.7717/peerj.17809)
Supplement: Supplemental Information 1 [file peerj-12-17809-s001.xlsx]

## Sheet: Sheet1
		Table S1: Antibiofilm absorbance of Diltiazem HCl against Staff epidermidis
			Optical Density absorbance
			Replicate1	Replicate2	Replicate 3
		Blank (Media only)	0.005	0.001	0.001
		(Control)	1.425	1.436	1.429
		Media + Organisms
		75% of MBC	0.075	0.071	0.068
		50% of MBC	0.132	0.127	0.126
		25% of MBC	0.212	0.22	0.217
