# Supplementary material for: Antimicrobial activities of Diltiazem Hydrochloride: drug repurposing approach
Source: PeerJ. 2024 Sep 23;12:e17809. doi: 10.7717/peerj.17809 (PMC11426324; doi:10.7717/peerj.17809)
Supplement: Supplemental Information 2 [file peerj-12-17809-s002.xlsx]

## Sheet: Sheet1
		Table S2: Antibiofilm absorbance of Diltiazem HCl against Staff aureus
			Optical Density absorbance
			Replicate1	Replicate2	Replicate 3
		Blank	0.005	0.001	0.001
		(Media only)
		(Control)	1.335	1.341	1.337
		Media + Organisms
		75% of MBC	0.125	0.123	0.131
		50% of MBC	0.187	0.19	0.186
		25% of MBC	0.25	0.248	0.251
