# Supplementary material for: Antimicrobial activities of Diltiazem Hydrochloride: drug repurposing approach
Source: PeerJ. 2024 Sep 23;12:e17809. doi: 10.7717/peerj.17809 (PMC11426324; doi:10.7717/peerj.17809)
Supplement: Supplemental Information 3 [file peerj-12-17809-s003.xlsx]

## Sheet: Sheet1
		Table S3: cytotoxicity absorbance of Diltiazem HCl against Normal Vero cell line.
		ID	ug/ml	O.D replicate 1	O.D replicate 2	O.D. replicate 3
		vero	--------	0.72	0.718	0.725
			1000	0.018	0.017	0.019
			500	0.161	0.148	0.152
			250	0.359	0.371	0.367
		Diltiazem HCl	125	0.637	0.629	0.641
			62.5	0.715	0.722	0.719
			31.25	0.721	0.717	0.718
