# Supplementary material for: Antimicrobial activities of Diltiazem Hydrochloride: drug repurposing approach
Source: PeerJ. 2024 Sep 23;12:e17809. doi: 10.7717/peerj.17809 (PMC11426324; doi:10.7717/peerj.17809)
Supplement: Supplemental Information 4 [file peerj-12-17809-s004.xlsx]

## Sheet: Sheet1
		Table S4: Antiviral Activity absorbance of Diltiazem HCl against CoxB4 virus
		Test	ug/ml	O.D. replicate 1	O.D. replicate 2	O.D. replicate 3
		Control vero		0.716	0.72	0.715
		CoxB4		0.291	0.283	0.296
		1	62.5	0.683	0.662	0.671
		2	31.25	0.5	0.527	0.516
		3	15.62	0.428	0.449	0.431
		4	7.81	0.317	0.298	0.306
